# Supplementary material for: Pirfenidone, an Anti-Fibrotic Drug, Suppresses the Growth of Human Prostate Cancer Cells by Inducing G1 Cell Cycle Arrest
Source: PubMed Central journal article supplement (PMC6351920; doi:10.3390/jcm8010044), 2019-01-04
Supplement: jcm-08-00044-s001.pdf [file jcm-08-00044-s001.pdf]

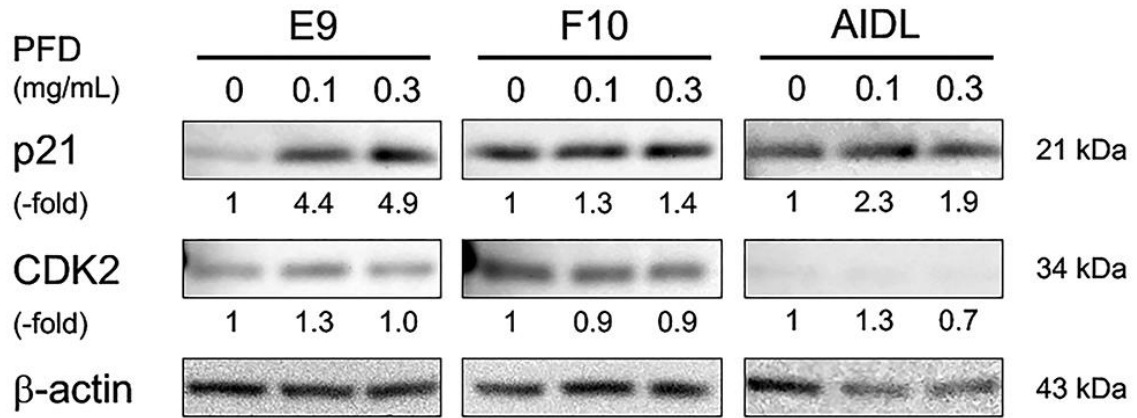

**Figure S1.** Effects of pirfenidone (PFD) treatment on the expression of cell cycle-related proteins in human prostate cancer cells. E9, F10, and AIDL cells were plated in 100-mm dishes and treated with PFD for 2 days. Cell lysates (50  $\mu$ g) were separated by electrophoresis using a 12.5% SDS-polyacrylamide gel. After separation, the proteins in the gel were transferred to a polyvinylidene difluoride membrane by electroblotting. p21 and CDK2 protein levels were determined by Western blot analysis using specific antibodies. Equal loading of the samples was confirmed by measuring  $\beta$ -actin protein levels.
